# Supplementary material for: Sex-specific eNOS activity and function in human endothelial cells
Source: PubMed Central journal article supplement (PMC5575132; doi:10.1038/s41598-017-10139-x), 2017-08-29
Supplement: 41598_2017_10139_MOESM1_ESM.pdf [file 41598_2017_10139_MOESM1_ESM.pdf]

## **SEX-SPECIFIC eNOS ACTIVITY AND FUNCTION IN HUMAN ENDOTHELIAL CELLS**

*Maria Grazia Cattaneo<sup>1,\*,#</sup>, Claudia Vanetti<sup>1,\*</sup>, Ilaria Decimo<sup>2</sup>, Marzia Di Chio<sup>2</sup>,  
Giuseppe Martano<sup>3</sup>, Giulia Garrone<sup>4</sup>, Francesco Bifarì<sup>5</sup>, Lucia Maria Vicentini<sup>1,#</sup>*

(1) Department of Medical Biotechnology and Translational Medicine,  
Università degli Studi di Milano, 20129 Milano, Italy;

(2) Department of Diagnostics and Public Health, Università di Verona, 37134 Verona, Italy;

(3) Institute of Neuroscience, CNR, 20129 Milano, Italy;

(4) Fondazione IRCCS, Istituto Nazionale dei Tumori, 20133 Milano, Italy;

(5) Laboratory of Cell Metabolism and Regenerative Medicine,  
Department of Medical Biotechnology and Translational Medicine,  
Università degli Studi di Milano, 20129 Milano, Italy

# SEX-SPECIFIC eNOS ACTIVITY AND FUNCTION IN HUMAN ENDOTHELIAL CELLS

M.G. Cattaneo, C. Vanetti, I. Decimo, M. Di Chio, G. Martano,  
G. Garrone, F. Bifari, L. M. Vicentini

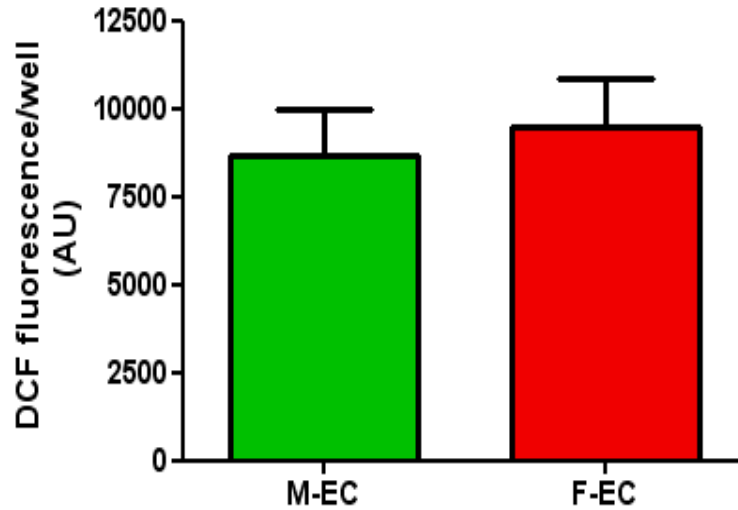

**Fig. S1.** ROS content was evaluated by measuring cell-associated fluorescence (expressed as arbitrary unit, AU) as described in the Supplementary Methods.  $p = 0.683$ ,  $n=13$ .

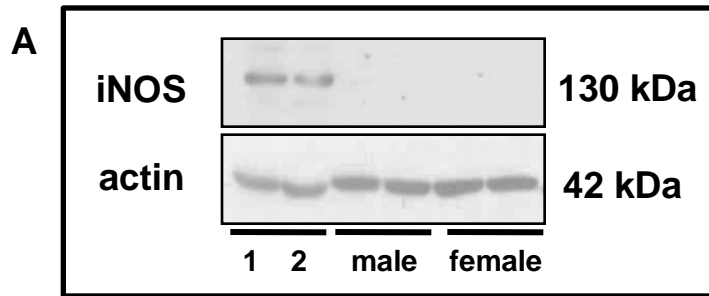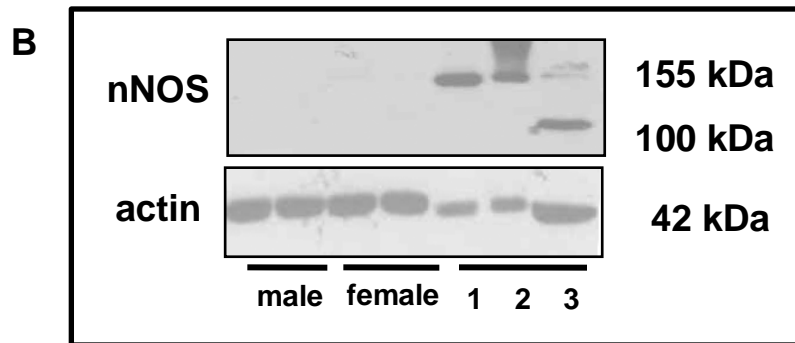

**Fig. S2 (A)** A representative immunoblotting showing total iNOS protein expression in 2 independent male and female EC lysates (20  $\mu$ g/lane). Lanes 1 and 2: mouse macrophages stimulated with LPS as described in the Supplementary Methods.  $\beta$ -actin was used as a loading control.

**Fig. S2 (B)** A representative immunoblotting showing total nNOS protein expression in 2 independent male and female EC lysates (20  $\mu$ g/lane). Lane 1: mouse brain cortex (7,5  $\mu$ g/lane); lane 2: rat hippocampus (7,5  $\mu$ g/lane); lane 3: human glioblastoma (U87MG cell line, 20  $\mu$ g/lane).  $\beta$ -actin was used as a loading control.

In mouse and rat homogenates, the expected 155 kDa band was clearly detectable. In human U87MG cells, a weak band was present at 155 kDa whereas a 100 kDa band was evident. The expression of nNOS in U87MG cells has been reported in the literature<sup>1</sup> but the corresponding MW has not been shown. However, a nNOS isoform corresponding to a 100 kDa band has been described in human cells<sup>2</sup>. Nevertheless, neither the 155 nor the 100 kDa bands were detectable in EC lysates.

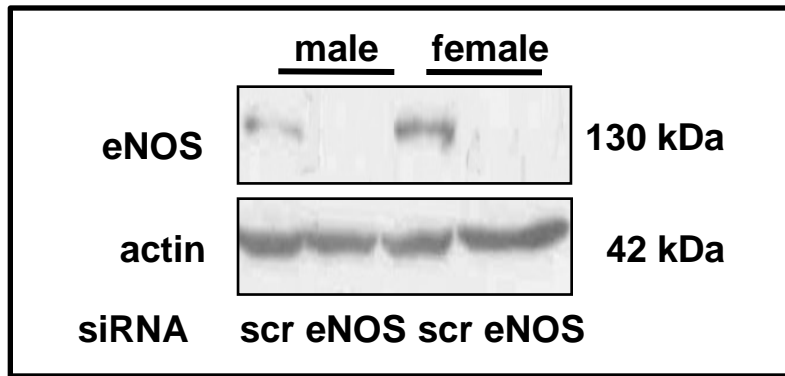

**Fig. S3.** A representative immunoblotting showing total eNOS protein expression in male and female EC lysates prepared 48h after transfection with scrambled (scr) or eNOS siRNA.  $\beta$ -actin was used as a loading control.

## Supplementary Methods

**Determination of Reactive Oxygen Species (ROS).** Male and female HUVECs were plated at a density of  $1.5 \times 10^4$  cells/well in black 96-well microplates, and loaded for 30 min at 37°C in the dark with the fluorescent dye 5(6)-Carboxy-2'7'-dichlorofluorescein diacetate (CM-DCFDA, 10  $\mu$ M) in HBSS buffer (Hepes 25 mM pH 7.4, NaCl 120 mM, KCl 5.4 mM, CaCl<sub>2</sub> 1.8 mM, NaHCO<sub>3</sub> 25 mM, glucose 15 mM) containing 1% FBS<sup>3</sup>. Cell-associated fluorescence was assessed by means of a multiplate reader with excitation and emission wavelengths of 485 nm and 530 nm, respectively (Victor™, PerkinElmer).

**Immunoblotting.** Western blots for neuronal and inducible NOSs (nNOS and iNOS, respectively) were carried out on total EC lysates prepared in Laemmli sample buffer containing 1 mM sodium orthovanadate. Equal amounts of proteins (20  $\mu$ g/lane) were separated by 8% SDS-PAGE, and then transferred onto nitrocellulose membranes following standard procedures. Membranes were blocked for 1 h with 5% milk in Tris-buffered saline containing 0.05% Tween-20 (TBS-T), and probed overnight at 4°C with the following primary antibodies diluted as indicated: mouse monoclonals anti-nNOS (BD Transduction Laboratories, cat #610309, 1:1.000 in 5% milk in TBS-T) and anti- $\beta$ -actin (Sigma Aldrich, cat #A2228, 1:1.000 in 5% milk in TBS-T), and rabbit monoclonal anti-iNOS (Abcam, cat #178945, 1:1.000 in 5% milk in TBS-T). After incubation with the appropriate HRP-conjugated secondary antibody (1:10.000 in 5% milk in TBS-T), immunoreactive bands were visualized by chemiluminescence (LiteAblot Turbo, EuroClone). Full length blots are shown in Figures 2 and 3. Positive controls are: mouse macrophages stimulated for 24 h with lipopolysaccharide (LPS, 1  $\mu$ g/ml) (kindly provided by Silvia Franchi, Dept of Pharmacological and Biomolecular Sciences, Università degli Studi di Milano, Italy) for iNOS; a mouse brain cortex homogenate (a kind gift of Irene Corradini, Dept of Medical Biotechnology and Translational Medicine, Università degli Studi di Milano, Italy), a rat hippocampus homogenate (kindly provided by Raffaella Molteni, Dept of Medical Biotechnology and Translational Medicine, Università degli Studi di Milano, Italy), and a human glioblastoma U87MG cell lysate (prepared in our

laboratory) for nNOS. Anti-iNOS and anti-nNOS antibodies were a kind gift of Cristiana Perrotta, Dept of Biomedical and Clinical Sciences "Luigi Sacco", Università degli Studi di Milano, Italy.

## References

- 1 Kashiwagi, S. *et al.* Perivascular nitric oxide gradients normalize tumor vasculature. *Nat Med* **14**, 255-257, doi:10.1038/nm1730 (2008).
- 2 Papadaki, M., Tilton, R. G., Eskin, S. G. & McIntire, L. V. Nitric oxide production by cultured human aortic smooth muscle cells: stimulation by fluid flow. *Am J Physiol* **274**, H616-626 (1998).
- 3 Cattaneo, M. G. *et al.* Chronic nitric oxide deprivation induces an adaptive antioxidant status in human endothelial cells. *Cellular Signalling* **25**, 2290-2297, doi:10.1016/j.cellsig.2013.07.026 (2013).
